# Supplementary material for: Hsa_circ_0000673 is down-regulated in gastric cancer and inhibits the proliferation and invasion of tumor cells by targetting miR-532-5p
Source: PubMed Central journal article supplement (PMC6146288; doi:10.1042/bsr20180538), 2018-09-19

Supplemental Fig. 1.

A. Analysis of hsa\_circ\_0074854 expression in normal human gastric epithelial cells (GES-1) and cultured GC cell lines by qRT-PCR. B. Analyses of hsa\_circ\_0074854 expression levels in 36 pairs of primary GC tissues (T) and their corresponding adjacent noncancerous tissues (N) by qRT-PCR. C. Analysis of hsa\_circ\_0009172 expression in normal human gastric epithelial cells (GES-1) and cultured GC cell lines by qRT-PCR. D. Analyses of hsa\_circ\_0009172 expression levels in 36 pairs of primary GC tissues (T) and their corresponding adjacent noncancerous tissues (N) by qRT-PCR.

**Supplemental Fig. 2.**

A. Stable overexpression of hsa\_circ\_0000673 in AGS and BGC823 cell lines was confirmed by qRT-PCR. Overexpression of hsa\_circ\_0000673 didn't affect the expression level of RSL1D1, the linear RNA isomer of hsa\_circ\_0000673. B. The results of qRT-PCR determined that the relative expression of hsa\_circ\_0000673 decreased by transfection with si-hsa\_circ\_0000673 in MGC803 cells, compared with the transfection with si-NC. Silencing hsa\_circ\_0000673 didn't affect the expression level of RSL1D1. C. The results of qRT-PCR showed that we successfully established hsa\_circ\_0000673 stable-silenced GC cells. Silencing hsa\_circ\_0000673 didn't affect the expression level of RSL1D1. Error bars represent mean  $\pm$  SD derived from three biologically independent experiments. A two-tailed Student's t-test was used for statistical analysis (\* P<0.05). NC, negative control.

**A**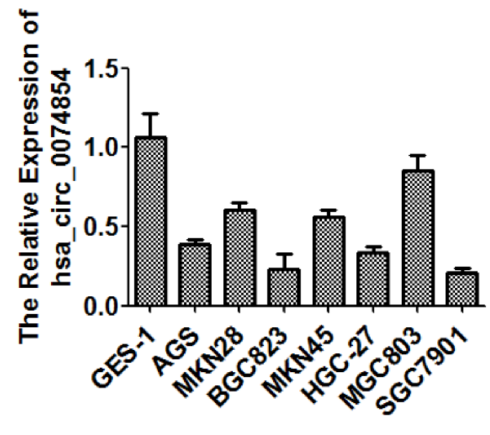**B**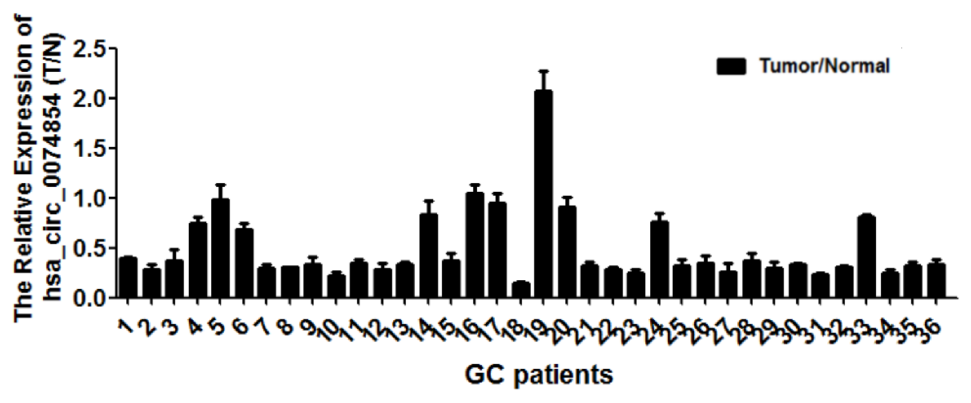**C**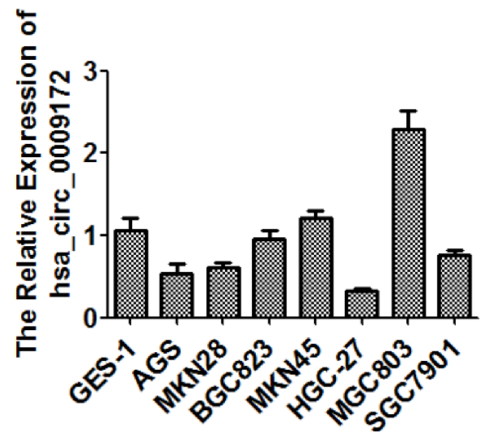**D**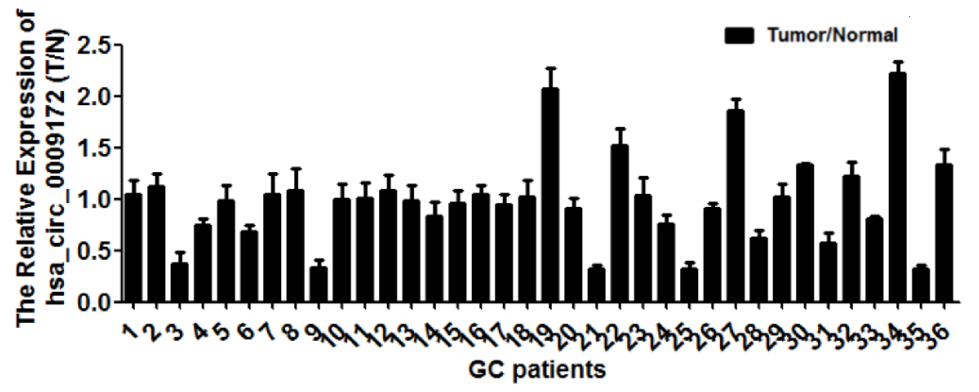

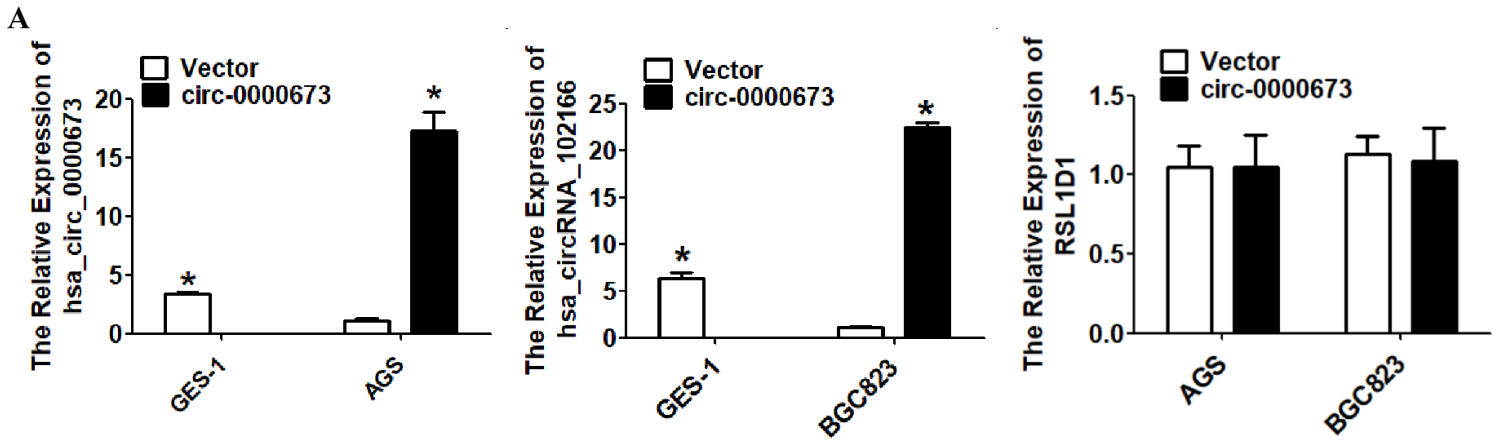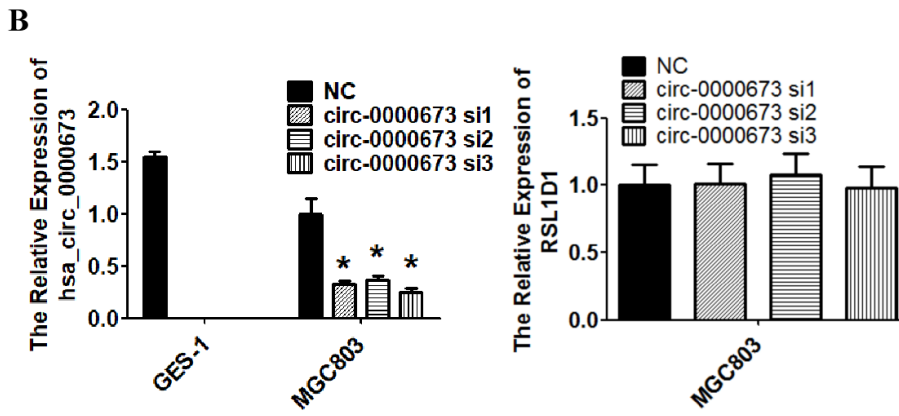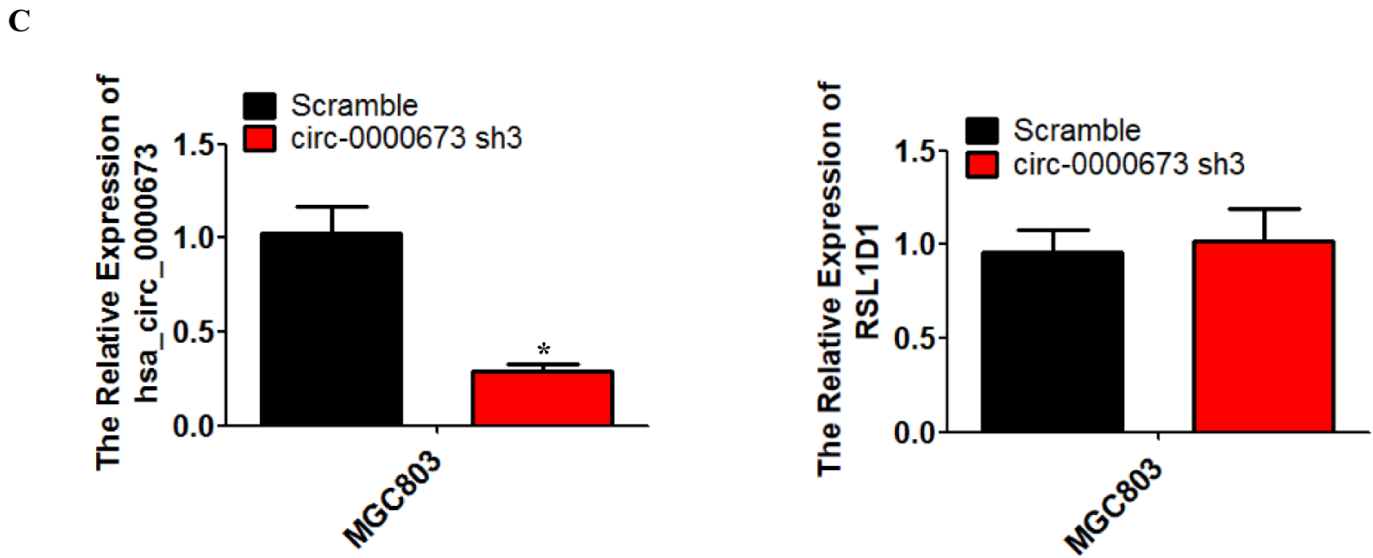

Supplement: bsr20180538_Supp1.pdf [file bsr20180538_Supp1.pdf]
